# Supplementary material for: Analysis of the Fragile X mental retardation protein isoforms 1, 2 and 3 interactions with the G-quadruplex forming semaphorin 3F mRNA
Source: Royal Society of Chemistry journal article supplement (doi:10.1039/c1mb05322a), 2011-12-01
Supplement: c1mb05322a.pdf [file c1mb05322a.pdf]

**Supplemental Figure 1.** Steady-state fluorescence spectroscopy emission changes at 371 nm of a 2AP reporter located in the terminal loop of a 16 nt control hairpin as FMRP ISO1, ISO2 or ISO3 are titrated into a fixed concentration of the RNA (150 nM). The sequence of the control RNA is UCACGGCG2APGCUGUGA.

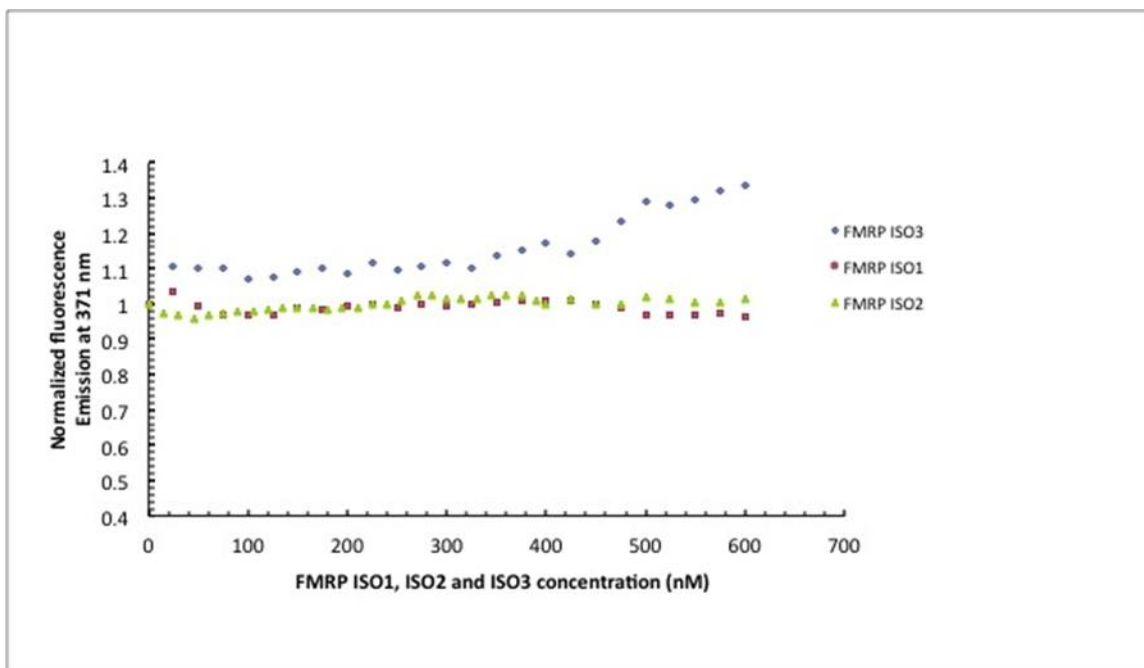

**Supplemental Table 1.** MALDI-TOF-MS analysis results for FMRP ISO2 (A.) and FMRP ISO3 (B.). Note that the fragment 508-522 shown in red is present only in FMRP ISO2, as residues 505-516 are missing from FMRP ISO3.

**A. FMRP ISO2**

| Amino Acid placement | Peptide sequence          | Observed Mass    | Expected Mass    | $\Delta$ mass |
|----------------------|---------------------------|------------------|------------------|---------------|
| 22 – 40              | K.DVHEDSITVAFENNWQPDR.Q   | 2272.0383        | 2271.0192        | 1.0191        |
| 58 – 70              | K.DINESDEVEVYSR.A         | 1554.6902        | 1553.6845        | 1.0057        |
| 129 – 138            | K.IKLDVPEDLR.Q            | 1197.6823        | 1196.6765        | 1.0058        |
| 219 – 226            | R.FHEQFIVR.E              | 1075.5728        | 1074.5611        | 1.0117        |
| 227 – 245            | R.EDLMGLAIGTHGANIQQAR.K   | 1995.0142        | 1994.0003        | 1.0139        |
| 277 – 290            | R.SFLEFAEDVIQVPR.N        | 1649.8616        | 1648.8461        | 1.0155        |
| 325 – 344            | K.NVPQEEEIMPPNSLPSNNSR.V  | 2252.0833        | 2251.0539        | 1.0294        |
| 355 – 372            | K.HLDIKENSTHFSQPNSTK.V    | 2083.0281        | 2082.0130        | 1.0151        |
| 376 – 393            | R.VLVASSVVAGESQKPELK.A    | 1841.0378        | 1840.0306        | 1.0072        |
| 408 – 425            | K.DSIANATVLLDYHLNYLK.E    | 2063.0969        | 2062.0735        | 1.0234        |
| 460 – 471            | K.SYVTDDGQGMGR.G          | 1301.5542        | 1300.5354        | 1.0188        |
| <b>508 – 522</b>     | <b>R.DELSDWSLAPTEER.E</b> | <b>1776.7792</b> | <b>1775.7850</b> | <b>0.9942</b> |
| 552 – 564            | K.GNDDHSRTDNRPR.N         | 1539.6798        | 1538.6934        | 0.9864        |

**B. FMRP ISO3**

| Amino Acid placement | Peptide sequence         | Observed Mass | Expected Mass | $\Delta$ mass |
|----------------------|--------------------------|---------------|---------------|---------------|
| 22 – 40              | K.DVHEDSITVAFENNWQPDR.Q  | 2272.0129     | 2271.0192     | 0.9937        |
| 58 – 70              | K.DINESDEVEVYSR.A        | 1554.6900     | 1553.6845     | 1.0055        |
| 129 – 138            | K.IKLDVPEDLR.Q           | 1197.6761     | 1196.6765     | 0.9996        |
| 219 – 226            | R.FHEQFIVR.E             | 1075.5663     | 1074.5611     | 1.0052        |
| 227 – 245            | R.EDLMGLAIGTHGANIQQAR.K  | 2010.9955     | 2009.9953     | 1.0002        |
| 277 – 290            | R.SFLEFAEDVIQVPR.N       | 1649.8597     | 1648.8461     | 1.0136        |
| 325 – 344            | K.NVPQEEEIMPPNSLPSNNSR.V | 2252.0669     | 2251.0539     | 1.013         |
| 355 – 372            | K.HLDIKENSTHFSQPNSTK.V   | 2083.0176     | 2082.0130     | 1.0046        |
| 376 – 393            | R.VLVASSVVAGESQKPELK.A   | 1841.0395     | 1840.0306     | 1.0089        |
| 408 – 425            | K.DSIANATVLLDYHLNYLK.E   | 2063.0833     | 2062.0735     | 1.0098        |
| 460 – 471            | K.SYVTDDGQGMGR.G         | 1285.5510     | 1284.5405     | 1.0105        |
| 552 – 564            | K.GNDDHSRTDNRPR.N        | 1539.7091     | 1538.6934     | 1.0157        |
